# Supplementary material
Source: PubMed Central journal article supplement (PMC3423255)

Figure S1.

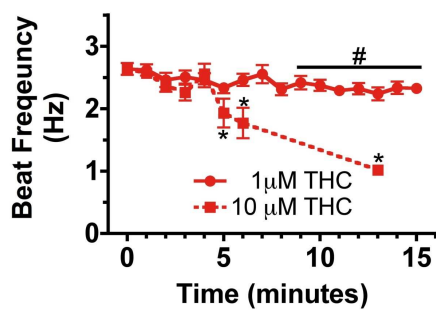

899x1163mm (72 x 72 DPI)

Supplement: bph0165-2575-SD1.pdf [file bph0165-2575-SD1.pdf]
